# Supplementary material for: Smartphone quantifies Salmonella from paper microfluidics
Source: Royal Society of Chemistry journal article supplement (doi:10.1039/c3lc50976a), 2013-01-01

**Initiate the camera**

**Overlay the trapezoid box on the camera view  
Show 3 operation buttons on the screen**

Focus button click? **Yes**

**Lock auto-focus and auto-exposure**

Reference button click? **Yes**

**Take a reference image; Select the areas of interest;  
Save average green pixel intensities; Trigger 30 s timer**

Signal button click? **Yes**

**Take a signal image; Select the areas of interest;  
Save average green pixel intensities**

**Calculate the normalized scatter intensities; Calculate and  
display the bacterial concentration using standard curve**

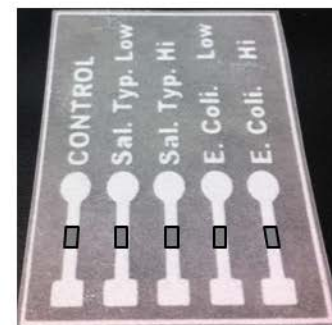

Supplement: c3lc50976a.pdf [file c3lc50976a.pdf]
